# Supplementary material for: Glyphosate Interaction with eEF1α1 Indicates Altered Protein Synthesis: Evidence for Reduced Spermatogenesis and Cytostatic Effect
Source: PubMed Central journal article supplement — ACS Omega. 2021 Jun 2;6(23):14848–57. doi: 10.1021/acsomega.1c00449 (PMC8209799; doi:10.1021/acsomega.1c00449), 2021-06-02
Supplement: ao1c00449_si_001.pdf [file ao1c00449_si_001.pdf]

## Supporting Info

# Glyphosate Interaction with eEF1 $\alpha$ 1 Indicates Altered Protein Synthesis: Evidence for Reduced Spermatogenesis and Cytostatic Effect

Bruno Sopko,<sup>†, ‡, #, §</sup> Gracian Tejral,<sup>#, §, †</sup> Guissepe Bitti,<sup>#, §</sup> Marianna Abate,<sup>¶</sup> Martina Medvedikova,<sup>‡</sup> Marian Hajduch,<sup>‡</sup> Jan Chloupek,<sup>‡</sup> Jolana Fajmonova,<sup>‡</sup> Misa Skoric,<sup>‡</sup> Evzen Amler,<sup>§, †</sup> and Tomas Erban<sup>†\*</sup>

<sup>†</sup>Crop Research Institute, Prague, Czechia.

<sup>‡</sup>Department of Medical Chemistry and Clinical Biochemistry, 2<sup>nd</sup> Faculty of Medicine, Charles University and Motol University Hospital, Prague, Czechia.

<sup>#</sup>Laboratory of Tissue Engineering, Institute of Experimental Medicine, Academy of Sciences of the Czech Republic, Prague, Czechia.

<sup>§</sup>Biomedicine and Advanced Biomaterials Department, University Center for Energy Efficient Buildings, The Czech Technical University in Prague, Czechia.

<sup>‡</sup>Department of Biophysics, 2<sup>nd</sup> Faculty of Medicine, Charles University, Prague, Czechia.

<sup>¶</sup>Department of Precision Medicine, University of Campania “Luigi Vanvitelli”, Naples, Italy.

<sup>‡</sup>Institute of Molecular and Translation Medicine, Faculty of Medicine and Dentistry, Palacky University, Olomouc, Czechia.

<sup>‡</sup>Department of Pharmacology and Pharmacy, Faculty of Veterinary Medicine, University of Veterinary and Pharmaceutical Sciences Brno, Brno, Czechia.

<sup>‡</sup>Department of Pathological Morphology and Parasitology, Faculty of Veterinary Medicine, University of Veterinary and Pharmaceutical Sciences Brno, Brno, Czechia.

**\*Corresponding author:**

**Tomas Erban** – <https://orcid.org/0000-0003-1730-779X>

E-mail: arachnid@centrum.cz

## Materials and Methods

**Table S1.** Criteria for Assessment of the Spermatogenic Index

| <b>Stage</b> | <b>Morphologic hallmarks</b>                                                                                   |
|--------------|----------------------------------------------------------------------------------------------------------------|
| 1            | Only spermatogonia present                                                                                     |
| 2            | Spermatogonia and spermatocytes present                                                                        |
| 3            | Spermatogonia, spermatocytes, and round (early) spermatids present with less than 5 late spermatids per tubule |
| 4            | Spermatogonia, spermatocytes, and round spermatids present with up to 25 late spermatids per tubule            |
| 5            | All cell types present with 50–75 late spermatids per tubule                                                   |
| 6            | All cell types present with more than 75 late spermatids per tubule                                            |

Results

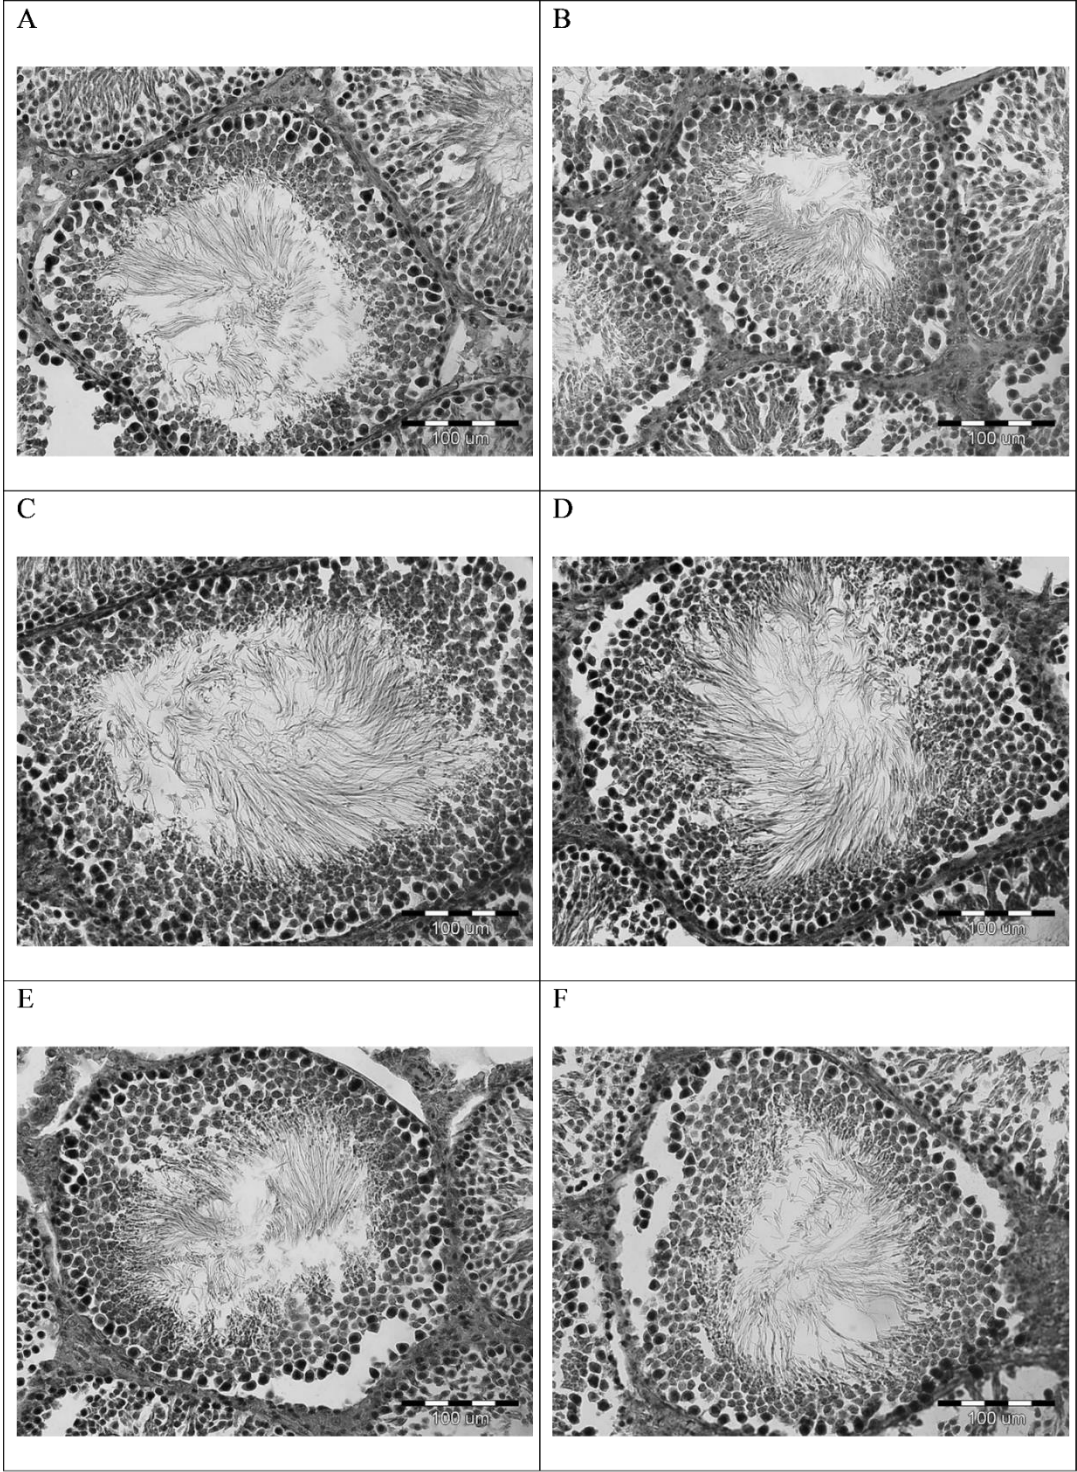

**Figure S1.** Representative microphotographs of rat testes tissue. (A–B) Control, (C–D) 0.7 mg/L glyphosate, and (E–F) 7 mg/L glyphosate. No unripe sperm cells were observed in the treatments (C–F).

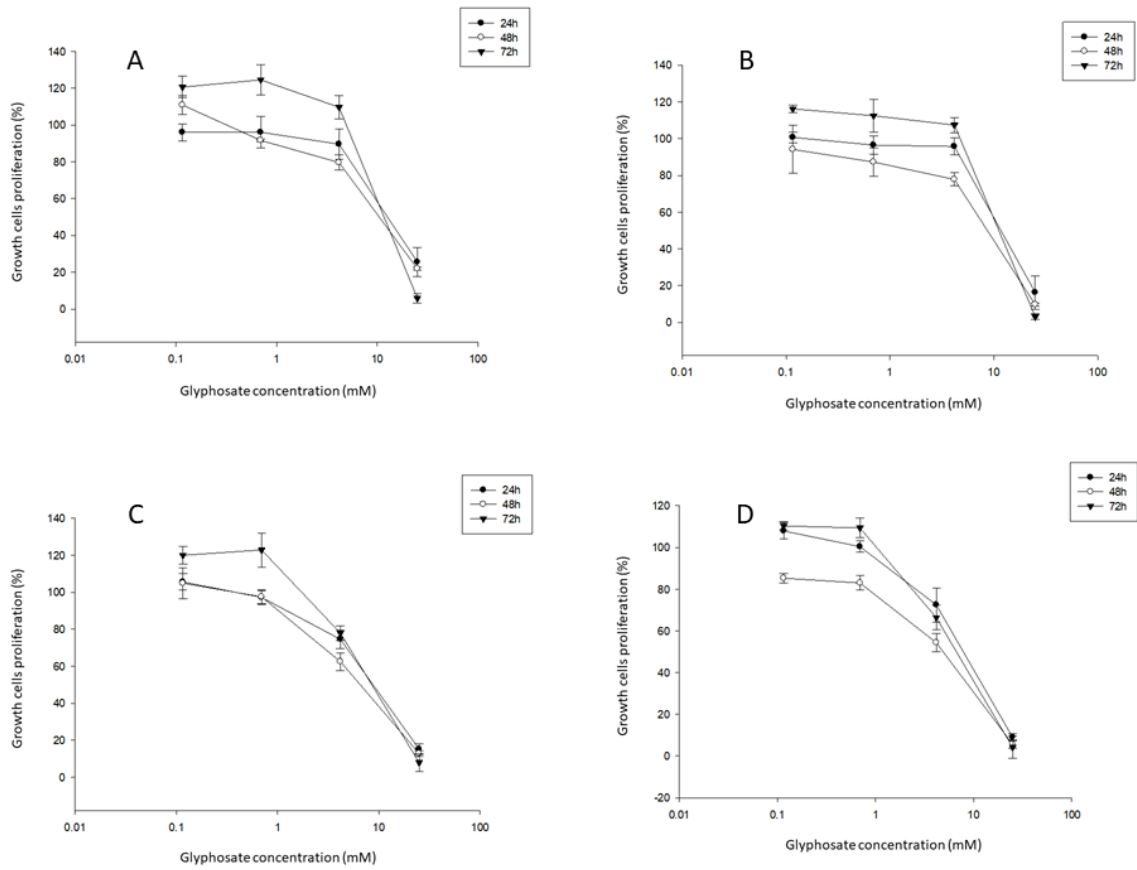

**Figure S2.** The proliferation of GC-1 and SUP-B15 cells analyzed by WST-1 assay. The proliferation was measured after 24-, 48- and 72-hours incubation of cells in glyphosate. (A) GC-1, 1-hour incubation period, (B) GC-1, 2-hours incubation period, (C) SUP-B15, 1-hour incubation period, (D) SUP-B15, 2-hours incubation period.

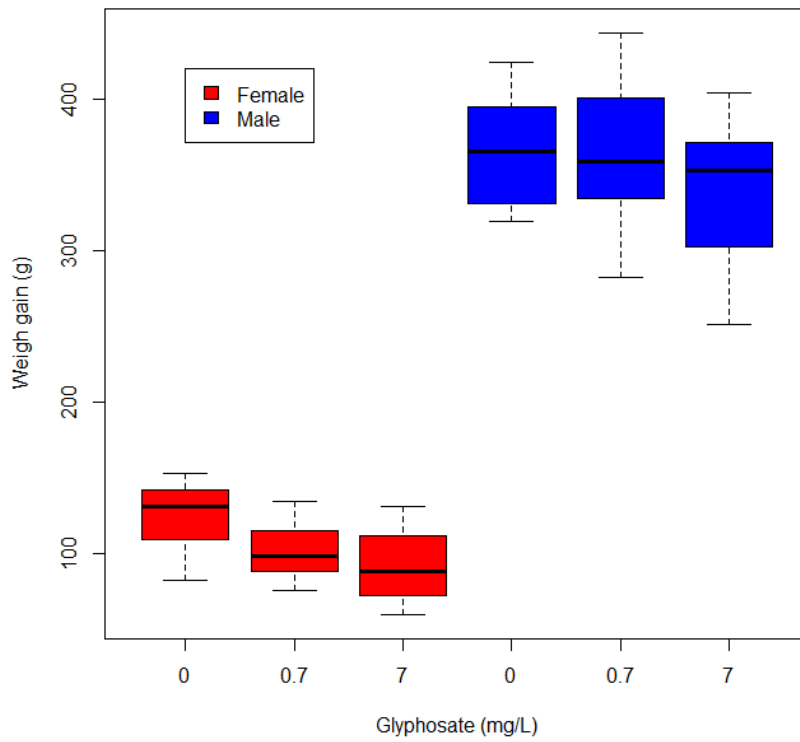

**Figure S3.** Average weight gain differences among treatments. The differences were significant for female ( $p=0.005$ ) but not for male ( $p=0.088$ ) rats.
